# Supplementary material for: High Prevalence of Multidrug-Resistant Bacteria in the Trachea of Intensive Care Units Admitted Patients: Evidence from a Bangladeshi Hospital
Source: MDPI journal article supplement (doi:10.3390/antibiotics13010062), 2024-01-08
Supplement: s1 [file s1]

## Supplementary tables:

**Table S1.** Sensitivity profile of the less prevalent isolated organisms: The degree of sensitivity exhibited by the bacterial isolates to the antibiotics is shown. The number enclosed by the first bracket is the percentage of isolates.

| Antibiotics             | <i>Streptococcus</i> spp. |          |          | <i>Enterococcus</i> spp. |        |        | <i>Enterobacter</i> spp. |        |         | <i>Moraxella</i> spp. |   |         | <i>Proteus</i> spp. |   |        | <i>Staphylococcus</i> spp. |   |         |
|-------------------------|---------------------------|----------|----------|--------------------------|--------|--------|--------------------------|--------|---------|-----------------------|---|---------|---------------------|---|--------|----------------------------|---|---------|
|                         | N = 6                     |          |          | N = 4                    |        |        | N = 2                    |        |         | N = 2                 |   |         | N = 2               |   |        | N = 2                      |   |         |
|                         | S                         | I        | R        | S                        | I      | R      | S                        | I      | R       | S                     | I | R       | S                   | I | R      | S                          | I | R       |
| <b>Penicillin</b>       |                           |          |          |                          |        |        |                          |        |         |                       |   |         |                     |   |        |                            |   |         |
| Amoxicillin             | 4 (66.7)                  | 0        | 2 (33.3) | 3 (75)                   | 0      | 1 (25) | 1 (50)                   | 0      | 1 (50)  | 1 (50)                | 0 | 1 (50)  | 1 (50)              | 0 | 1 (50) | 0                          | 0 | 2 (100) |
| Ampicillin              | 4 (66.7)                  | 0        | 2 (33.3) | 3 (75)                   | 0      | 1 (25) | 1 (50)                   | 0      | 1 (50)  | 1 (50)                | 0 | 1 (50)  | 1 (50)              | 0 | 1 (50) | 0                          | 0 | 2 (100) |
| Cloxacillin             | 3 (50)                    | 0        | 3 (50)   | 3 (75)                   | 0      | 1 (25) | 1 (50)                   | 0      | 1 (50)  | 0                     | 0 | 2 (100) | 1 (50)              | 0 | 1 (50) | 1 (50)                     | 0 | 1 (50)  |
| Amoxiclav               | 5 (83.3)                  | 0        | 1 (16.7) | 3 (75)                   | 0      | 1 (25) | 2 (100)                  | 0      | 0       | 2 (100)               | 0 | 0       | 1 (50)              | 0 | 1 (50) | 0                          | 0 | 2 (100) |
| <b>Aminoglycoside</b>   |                           |          |          |                          |        |        |                          |        |         |                       |   |         |                     |   |        |                            |   |         |
| Amikacin                | 1 (16.7)                  | 0        | 5 (83.3) | 1 (25)                   | 1 (25) | 2 (50) | 0                        | 1 (50) | 1 (50)  | 1 (50)                | 0 | 1 (50)  | 2 (100)             | 0 | 0      | 1 (50)                     | 0 | 1 (50)  |
| Gentamicin              | 1 (16.7)                  | 2 (33.3) | 3 (50)   | 1 (25)                   | 1 (25) | 2 (50) | 2 (100)                  | 0      | 0       | 2 (100)               | 0 | 0       | 1 (50)              | 0 | 1 (50) | 1 (50)                     | 0 | 1 (50)  |
| Netilmicin              | 3 (50)                    | 1 (16.7) | 2 (33.3) | 0                        | 1 (25) | 3 (75) | 2 (100)                  | 0      | 0       | 1 (50)                | 0 | 1 (50)  | 1 (50)              | 0 | 1 (50) | 1 (50)                     | 0 | 1 (50)  |
| <b>Cephalosporin</b>    |                           |          |          |                          |        |        |                          |        |         |                       |   |         |                     |   |        |                            |   |         |
| Cefepime                | 4 (66.7)                  | 0        | 2 (33.3) | 3 (75)                   | 0      | 1 (25) | 1 (50)                   | 0      | 1 (50)  | 1 (50)                | 0 | 1 (50)  | 2 (100)             | 0 | 0      | 1 (50)                     | 0 | 1 (50)  |
| Cefixime                | 2 (33.3)                  | 2 (33.3) | 2 (33.3) | 1 (25)                   | 0      | 3 (75) | 0                        | 0      | 2 (100) | 1 (50)                | 0 | 1 (50)  | 1 (50)              | 0 | 1 (50) | 0                          | 0 | 2 (100) |
| Cefotaxime              | 3 (50)                    | 0        | 3 (50)   | 3 (75)                   | 0      | 1 (25) | 1 (50)                   | 0      | 1 (50)  | 1 (50)                | 0 | 1 (50)  | 1 (50)              | 0 | 1 (50) | 0                          | 0 | 2 (100) |
| Ceftazidime             | 3 (50)                    | 0        | 3 (50)   | 3 (75)                   | 0      | 1 (25) | 0                        | 0      | 2 (100) | 1 (50)                | 0 | 1 (50)  | 2 (100)             | 0 | 0      | 0                          | 0 | 2 (100) |
| Cefuroxime              | 3 (50)                    | 0        | 3 (50)   | 2 (50)                   | 1 (25) | 1 (25) | 1 (50)                   | 0      | 1 (50)  | 2 (100)               | 0 | 0       | 1 (50)              | 0 | 1 (50) | 1 (50)                     | 0 | 1 (50)  |
| Ceftriaxone             | 3 (50)                    | 0        | 3 (50)   | 3 (75)                   | 0      | 1 (25) | 1 (50)                   | 0      | 1 (50)  | 1 (50)                | 0 | 1 (50)  | 1 (50)              | 0 | 1 (50) | 1 (50)                     | 0 | 1 (50)  |
| Cephalexin              | 0                         | 1 (16.7) | 5 (83.3) | 3 (75)                   | 0      | 1 (25) | 1 (50)                   | 0      | 1 (50)  | 1 (50)                | 0 | 1 (50)  | 1 (50)              | 0 | 1 (50) | 0                          | 0 | 2 (100) |
| <b>Fluoroquinolones</b> |                           |          |          |                          |        |        |                          |        |         |                       |   |         |                     |   |        |                            |   |         |

| Antibiotics                                 | <i>Streptococcus</i> spp. |          |          | <i>Enterococcus</i> spp. |   |         | <i>Enterobacter</i> spp. |        |        | <i>Moraxella</i> spp. |   |        | <i>Proteus</i> spp. |   |        | <i>Staphylococcus</i> spp. |        |         |
|---------------------------------------------|---------------------------|----------|----------|--------------------------|---|---------|--------------------------|--------|--------|-----------------------|---|--------|---------------------|---|--------|----------------------------|--------|---------|
|                                             | N = 6                     |          |          | N = 4                    |   |         | N = 2                    |        |        | N = 2                 |   |        | N = 2               |   |        | N = 2                      |        |         |
|                                             | S                         | I        | R        | S                        | I | R       | S                        | I      | R      | S                     | I | R      | S                   | I | R      | S                          | I      | R       |
| Ciprofloxacin                               | 2 (33.3)                  | 2 (33.3) | 2 (33.3) | 2 (50)                   | 0 | 2 (50)  | 1 (50)                   | 1 (50) | 0      | 1 (50)                | 0 | 1 (50) | 1 (50)              | 0 | 1 (50) | 1 (50)                     | 0      | 1 (50)  |
| Levofloxacin                                | 3 (50)                    | 0        | 3 (50)   | 3 (75)                   | 0 | 1 (25)  | 1 (50)                   | 0      | 1 (50) | 2 (100)               | 0 | 0      | 1 (50)              | 0 | 1 (50) | 0                          | 0      | 2 (100) |
| <b>Carbapenem</b>                           |                           |          |          |                          |   |         |                          |        |        |                       |   |        |                     |   |        |                            |        |         |
| Imipenem                                    | 4 (66.7)                  | 0        | 2 (33.3) | 3 (75)                   | 0 | 1 (25)  | 2 (100)                  | 0      | 0      | 1 (50)                | 0 | 1 (50) | 2 (100)             | 0 | 0      | 1 (50)                     | 0      | 1 (50)  |
| Meropenem                                   | 4 (66.7)                  | 0        | 2 (33.3) | 3 (75)                   | 0 | 1 (25)  | 2 (100)                  | 0      | 0      | 1 (50)                | 0 | 1 (50) | 1 (50)              | 0 | 1 (50) | 0                          | 0      | 2 (100) |
| <b>Polymyxin</b>                            |                           |          |          |                          |   |         |                          |        |        |                       |   |        |                     |   |        |                            |        |         |
| Colistin                                    | 4 (66.7)                  | 0        | 2 (33.3) | 3 (75)                   | 0 | 1 (25)  | 1 (50)                   | 0      | 1 (50) | 1 (50)                | 0 | 1 (50) | 2 (100)             | 0 | 0      |                            |        |         |
| <b>Sulfonamide</b>                          |                           |          |          |                          |   |         |                          |        |        |                       |   |        |                     |   |        |                            |        |         |
| Cotrimoxazole                               | 1 (16.7)                  | 1 (16.7) | 4 (66.7) | 0                        | 0 | 4 (100) | 1 (50)                   | 0      | 1 (50) | 2 (100)               | 0 | 0      | 1 (50)              | 0 | 1 (50) | 1 (50)                     | 0      | 1 (50)  |
| <b>Oxazolidinone</b>                        |                           |          |          |                          |   |         |                          |        |        |                       |   |        |                     |   |        |                            |        |         |
| Linezolid                                   |                           |          |          |                          |   |         |                          |        |        |                       |   |        |                     |   |        | 1 (50)                     | 0      | 1 (50)  |
| <b>Glycopeptide</b>                         |                           |          |          |                          |   |         |                          |        |        |                       |   |        |                     |   |        |                            |        |         |
| Vancomycin                                  |                           |          |          |                          |   |         |                          |        |        |                       |   |        |                     |   |        | 1 (50)                     | 0      | 1 (50)  |
| <b>Tigecycline</b>                          |                           |          |          |                          |   |         |                          |        |        |                       |   |        |                     |   |        |                            |        |         |
| Tigecycline                                 | 6 (100)                   | 0        | 0        | 4 (100)                  | 0 | 0       | 2 (100)                  | 0      | 0      | 1 (50)                | 0 | 1 (50) | 2 (100)             | 0 | 0      | 0                          | 1 (50) | 1 (50)  |
| <b>Fusidane</b>                             |                           |          |          |                          |   |         |                          |        |        |                       |   |        |                     |   |        |                            |        |         |
| Fusidic Acid                                |                           |          |          |                          |   |         |                          |        |        |                       |   |        |                     |   |        | 1 (50)                     | 0      | 1 (50)  |
| <b>Monobactam</b>                           |                           |          |          |                          |   |         |                          |        |        |                       |   |        |                     |   |        |                            |        |         |
| Aztreonam                                   | 3 (50)                    | 0        | 3 (50)   | 3 (75)                   | 0 | 1 (25)  | 1 (50)                   | 0      | 1 (50) | 1 (50)                | 0 | 1 (50) | 2 (100)             | 0 | 0      |                            |        |         |
| <b>Beta-lactamase inhibitor + pencillin</b> |                           |          |          |                          |   |         |                          |        |        |                       |   |        |                     |   |        |                            |        |         |
| Tazobactam + Piperacillin                   | 6 (100)                   | 0        | 0        | 3 (75)                   | 0 | 1 (25)  | 1 (50)                   | 0      | 1 (50) | 1 (50)                | 0 | 1 (50) | 2 (100)             | 0 | 0      | 0                          | 0      | 2 (100) |

S: sensitive; I: intermediate; R: resistance

**Table S2.** Antimicrobial panels: The antibiotic class, the name of the antibiotics, and their spectrum is mentioned.

| Drug groups                           | Drugs         | Gram-negative panel | Gram-positive panel |
|---------------------------------------|---------------|---------------------|---------------------|
| Penicillin                            | Amoxicillin   | ✓                   | ✓                   |
|                                       | Ampicillin    | ✓                   | ✓                   |
|                                       | Cloxacillin   | ✓                   | ✓                   |
|                                       | Amoxiclav     |                     | ✓                   |
| Aminoglycoside                        | Amikacin      | ✓                   | ✓                   |
|                                       | Gentamycin    | ✓                   | ✓                   |
|                                       | Netilmicin    | ✓                   | ✓                   |
| Cephalosporin                         | Cefepime      | ✓                   | ✓                   |
|                                       | Cefixime      | ✓                   | ✓                   |
|                                       | Cefotaxime    | ✓                   | ✓                   |
|                                       | Ceftazidime   | ✓                   | ✓                   |
|                                       | Cefuroxime    | ✓                   | ✓                   |
|                                       | Ceftriaxone   | ✓                   | ✓                   |
|                                       | Cephalexin    | ✓                   | ✓                   |
|                                       |               |                     |                     |
| Fluoroquinolones                      | Ciprofloxacin | ✓                   | ✓                   |
|                                       | Levofloxacin  | ✓                   |                     |
| Carbapenem                            | Imipenem      | ✓                   | ✓                   |
|                                       | Meropenem     | ✓                   | ✓                   |
| Polymyxin                             | Colistin      | ✓                   |                     |
| Sulfonamide                           | Cotrimoxazole | ✓                   | ✓                   |
| Oxazolidinone                         | Linezolid     |                     | ✓                   |
| Glycopeptide                          | Vancomycin    |                     | ✓                   |
| Tigecycline                           | Tigecycline   | ✓                   | ✓                   |
| Fusidane                              | Fusidic Acid  |                     | ✓                   |
| Monobactam                            | Aztreonam     | ✓                   |                     |
| Beta-lactamase inhibitor + penicillin | Tazobactam +  | ✓                   |                     |
|                                       | Piperacillin  |                     |                     |

**Table S3.** Colony morphology of specific bacteria on selective media.

| Organism                     | Gram +ve/-ve | Media                           | Expected Colony Morphology                                                        | Reference                                                                                  |
|------------------------------|--------------|---------------------------------|-----------------------------------------------------------------------------------|--------------------------------------------------------------------------------------------|
| <i>Escherichia coli</i>      | -ve          | Eosin Methylene Blue agar (EMB) | Blue-black colonies with green metallic sheen                                     | Basavaraju & Gunashree, 2023 [42]                                                          |
| <i>Pseudomonas spp.</i>      | -ve          | Cetrimide Agar                  | Yellow-green to blue-green colonies which exhibit fluorescence at 250 nm UV light | <i>Cetrimide Agar</i>   <i>Principle</i>   <i>Preparation</i>   <i>Results</i> , n.d. [43] |
| <i>Klebsiella spp.</i>       | -ve          | Klebsiella Blue Agar            | Dark green                                                                        | Prasad et al., 2022 [44]                                                                   |
| <i>Moraxella spp.</i>        | -ve          | Blood agar                      | Smooth, flat, uniform, buff colonies                                              | Public Health England, 2015 [45]                                                           |
| <i>Enterobacter spp.</i>     | -ve          | Eosin Methylene Blue agar (EMB) | Pink/buff color with darker centers                                               | Libretexts, 2021 [46]                                                                      |
| <i>Acinetobacter spp.</i>    | -ve          | CHROMagar Acinetobacter         | Red colonies                                                                      | Ajao et al., 2011 [47]                                                                     |
| <i>Proteus spp.</i>          | -ve          | MacConkey agar                  | Smooth, pale, or colorless colonies                                               | Tankeshwar & Tankeshwar, 2022 [48]                                                         |
| <i>Staphylococcus aureus</i> | +ve          | Mannitol salt agar (MSA)        | Yellow, round colonies                                                            | Missiakas & Schneewind, 2013 [49]                                                          |
| <i>Staphylococcus spp.</i>   | +ve          | Mannitol salt agar (MSA)        | Yellow, round colonies                                                            | Missiakas & Schneewind, 2013 [49]                                                          |
| <i>Streptococcus spp.</i>    | +ve          | Blood agar                      | Grayish-white, smooth, glossy, and translucent colonies                           | Hossain, 2014 [50]                                                                         |
| <i>Enterococcus spp.</i>     | +ve          | M-enterococcus (ME) agar        | Round, pink to dark maroon-colored colonies                                       | "M-enterococcus (ME) Agar," 2003 [51]                                                      |

**Table S4.** Biochemical test interpretation for different organisms.

| Organism                      | Motility | Indole   | Urease | Catalase | Oxidase | MR  | VP  | Citrate utilization | Glucose Ferm. | Sucrose Ferm. | Lactose Ferm. | Gas Prod. | H <sub>2</sub> S Prod. | Hemolysis        | Reference                 |
|-------------------------------|----------|----------|--------|----------|---------|-----|-----|---------------------|---------------|---------------|---------------|-----------|------------------------|------------------|---------------------------|
| <i>Escherichia coli</i>       | +ve      | +ve      | -ve    | +ve      | -ve     | +ve | -ve | -ve                 | +ve           | variable      | +ve           | +ve       | -ve                    | Alpha/Beta/Gamma | Aryal, 2022 [52]          |
| <i>Pseudomonas spp.</i>       | +ve      | -ve      | -ve    | +ve      | +ve     | -ve | -ve | +ve                 | -ve           | -ve           | -ve           | +ve       | -ve                    | Beta             | Aryal, 2022 [53]          |
| <i>Klebsiella spp.</i>        | -ve      | -ve      | +ve    | +ve      | -ve     | -ve | +ve | +ve                 | +ve           | +ve           | +ve           | +ve       | -ve                    | Gamma            | Aryal, 2022 [54]          |
| <i>Moraxella spp.</i>         | -ve      | -ve      | -ve    | +ve      | +ve     | -ve |     | -ve                 | -ve           | -ve           | -ve           | -ve       | -ve                    | Gamma            | Sheikh et al., 2020) [55] |
| <i>Enterobacter spp.</i>      | +ve      | -ve      | -ve    | +ve      | -ve     | -ve | +ve | +ve                 | +ve           | +ve           | +ve           | +ve       | -ve                    |                  | Aryal, 2022 [56]          |
| <i>Acinetobacter spp.</i>     | -ve      | -ve      | -ve    | +ve      | -ve     | -ve | -ve | +ve                 | +ve           | -ve           | variable      | -ve       | -ve                    | Gamma            | Aryal, 2022 [57]          |
| <i>Proteus spp.</i>           | +ve      | variable | +ve    | +ve      | -ve     | +ve | -ve | variable            | +ve           | -ve           | -ve           | variable  | +ve                    | Gamma/Beta       | Aryal, 2022 [58]          |
| <i>Staphylococcus aureus*</i> | -ve      | -ve      | +ve    | +ve      | -ve     | +ve | +ve | +ve                 | +ve           | +ve           | +ve           | -ve       | -ve                    | Beta             | Aryal, 2022 [59]          |
| <i>Streptococcus spp.</i>     | -ve      | -ve      | -ve    | -ve      | -ve     | +ve | -ve | +ve                 | +ve           | +ve           | +ve           | -ve       | -ve                    | Beta             | Batra, 2020 [60]          |
| <i>Enterococcus spp.</i>      | -ve      | -ve      | -ve    | -ve      | -ve     |     | +ve | -ve                 | +ve           | variable      | +ve           | -ve       | -ve                    | Gamma/Alpha      | Aryal, 2022 [61]          |

\**Staphylococcus aureus* was further differentiated from the other *Staphylococcus spp.* by coagulase test. *Staphylococcus aureus* is coagulase positive. MR: Methyl red test; VP: Voges-Proskauer test
